# Supplementary material for: The effect of interligand energy transfer on the emission spectra of heteroleptic Ir complexes
Source: Royal Society of Chemistry journal article supplement (doi:10.1039/c7cp00500h), 2017-01-01
Supplement: c7cp00500h1.pdf [file c7cp00500h1.pdf]

## Effect of interligand energy transfer on the emission spectra of heteroleptic Ir complexes

Yang-Jin Cho,<sup>a</sup> So-Yoen Kim,<sup>a</sup> Ho-jin Son,<sup>a\*</sup> Dae Won Cho<sup>ab\*</sup> and Sang Ook Kang<sup>a\*</sup>

<sup>a</sup> Department of Advanced Materials Chemistry, Korea University (Sejong), Sejong, 30019, South Korea. E-mails: [hjson@korea.ac.kr](mailto:hjson@korea.ac.kr) and [sangok@korea.ac.kr](mailto:sangok@korea.ac.kr)

<sup>b</sup> Center for Photovoltaic Materials, Korea University (Sejong), Sejong, 30019, South Korea. E-mail: [dwcho@korea.ac.kr](mailto:dwcho@korea.ac.kr)

### Figure

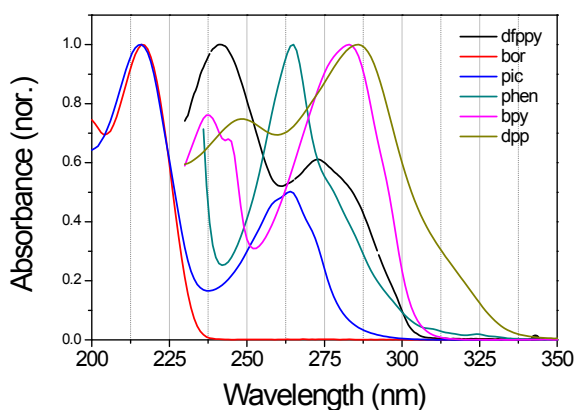

**Fig. S1.** Absorption spectra of various ancillary ligands in  $\text{CH}_2\text{Cl}_2$ . Especially ethanol was used as solvent for bor and pic ligands due to good solubility in ethanol.
